# Supplementary material for: Complexes of hydroxy(thio)pyrone and hydroxy(thio)pyridinone with Zn(ii) and Mo(vi). Thermodynamic stability and insulin-mimetic activity
Source: Royal Society of Chemistry journal article supplement (doi:10.1039/b914169c), 2009-11-09
Supplement: b914169c.pdf [file b914169c.pdf]

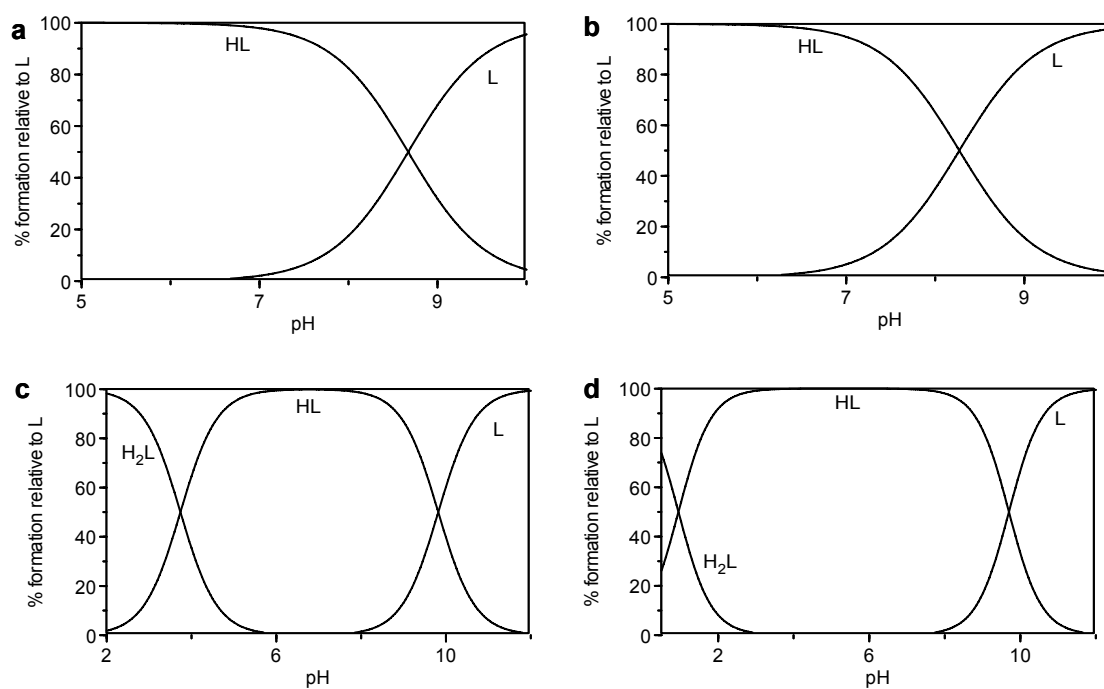

**Fig. S1.** Species distribution diagrams for maltol **a**, thiomaltol **b**, DMHP **c** and DMHTP **d**.  $C_L = 2 \times 10^{-3}$  M

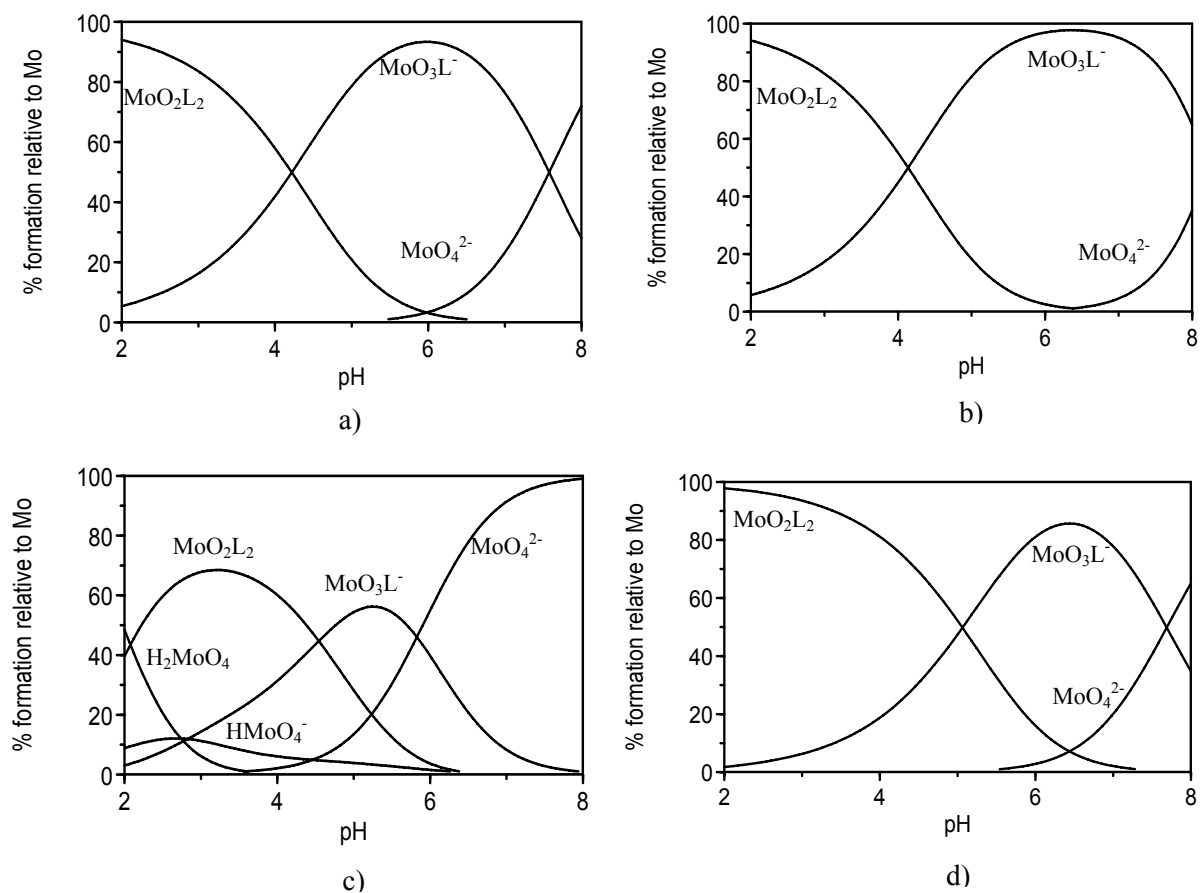

**Fig. S2.** Species distribution diagrams for the Mo(VI) systems with a) maltol; b) thiomaltol; c) DMHP; d) DMHTP ( $C_M = 2.52 \times 10^{-5}$  M,  $C_L/C_M = 2$ ).
